# Supplementary material
Source: PubMed Central journal article supplement (PMC3825509)
Supplement: NIHMS437631-supplement-01.pdf [file NIHMS437631-supplement-01.pdf]

**Supplemental Table 1. Correlation analysis.** Spearman's  $\rho$  (rho) rank correlation between CNP molecular forms and pertinent biomarkers of disease severity or prognosis in ADHF patients.

|                                              | <i>Urine CNP22</i> |         | <i>Urine CNP53</i> |         | <i>Urine NT-CNP53</i> |         |
|----------------------------------------------|--------------------|---------|--------------------|---------|-----------------------|---------|
|                                              | $\rho$             | p-value | $\rho$             | p-value | $\rho$                | p-value |
| <b>Age</b>                                   | 0.04               | 0.74    | 0.08               | 0.57    | 0.06                  | 0.65    |
| <b>eGFR</b>                                  | -0.11              | 0.41    | 0.08               | 0.53    | 0.27                  | 0.04    |
| <b>Urine total protein/ creatinine ratio</b> | 0.68               | 0.0001  | -0.42              | 0.06    | 0.04                  | 0.85    |
| <i>Urinary biomarkers</i>                    |                    |         |                    |         |                       |         |
| <b>KIM-1</b>                                 | 0.19               | 0.16    | 0.30               | 0.02    | 0.21                  | 0.11    |
| <b>NGAL</b>                                  | 0.43               | 0.0007  | 0.12               | 0.36    | 0.07                  | 0.61    |
| <b>CNP22</b>                                 | 1                  | -       | 0.66               | <0.0001 | 0.50                  | <0.0001 |
| <b>CNP53</b>                                 | 0.66               | <0.0001 | 1                  | -       | 0.58                  | <0.0001 |
| <b>NT-CNP53</b>                              | 0.50               | <0.0001 | 0.58               | <0.0001 | 1                     | -       |
| <i>Plasma biomarkers</i>                     |                    |         |                    |         |                       |         |
| <b>CNP22</b>                                 | 0.28               | 0.04    | 0.24               | 0.07    | 0.26                  | 0.05    |
| <b>CNP53</b>                                 | 0.12               | 0.39    | -0.08              | 0.52    | -0.12                 | 0.38    |
| <b>NT-CNP53</b>                              | -0.08              | 0.58    | 0.09               | 0.53    | -0.14                 | 0.31    |
| <b>NT-proBNP</b>                             | 0.45               | 0.0003  | 0.33               | 0.01    | 0.09                  | 0.53    |

eGFR, estimated glomerular filtration rate; KIM-1, kidney injury molecule-1; NGAL, neutrophil

gelatinase-associated lipocalin; CNP22, C-type natriuretic peptide-22; CNP53, C-type natriuretic peptide-

53; NT-CNP53, N-terminal fragment of C-type natriuretic peptide -53; NT-proBNP, N-terminal pro-B

type natriuretic peptide.

**Supplemental Table 2. Univariate predictive value of urine and plasma biomarkers for clinical outcome in ADHF patients. Cox proportional hazard analysis.**

| <i>Model</i>                        | <i>Outcome</i>     |                |                                            |                |
|-------------------------------------|--------------------|----------------|--------------------------------------------|----------------|
|                                     | <b>Death</b>       |                | <b>All-cause rehospitalization / death</b> |                |
|                                     | <b>HR (95% CI)</b> | <b>p-value</b> | <b>HR (95%CI)</b>                          | <b>p-value</b> |
| <i>Unadjusted urine biomarker*</i>  |                    |                |                                            |                |
| <b>CNP22</b>                        | 1.28 (0.80-1.91)   | 0.29           | 1.09 (0.78-1.46)                           | 0.59           |
| <b>CNP53</b>                        | 1.18 (0.87-1.53)   | 0.27           | 1.05 (0.84-1.28)                           | 0.65           |
| <b>NT-CNP53</b>                     | 1.67 (1.14-2.37)   | 0.01           | 1.78 (1.30-2.39)                           | 0.0004         |
| <b>KIM-1</b>                        | 1.28 (0.72-2.40)   | 0.42           | 1.21 (0.80-1.91)                           | 0.38           |
| <b>NGAL</b>                         | 1.11 (0.84-1.42)   | 0.45           | 1.07 (0.86-1.32)                           | 0.54           |
| <i>Unadjusted plasma biomarker*</i> |                    |                |                                            |                |
| <b>CNP22</b>                        | 1.03 (1.00-1.06)   | 0.06           | 1.02 (0.99-1.05)                           | 0.12           |
| <b>CNP53</b>                        | 0.92 (0.76-1.05)   | 0.28           | 1.01 (0.92-1.09)                           | 0.74           |
| <b>NT-CNP53</b>                     | 1.06 (0.83-1.30)   | 0.60           | 0.96 (0.80-1.13)                           | 0.64           |
| <b>NT-proBNP</b>                    | 1.28 (0.85-1.93)   | 0.24           | 1.24 (0.94-1.65)                           | 0.13           |

\*Ln transformed data (hazard ratio are per 1 log unit increase)

KIM-1, kidney injury molecule 1; NGAL, neutrophil gelatinase-associated lipocalin; CNP22, C-type natriuretic peptide-22; CNP53, C-type natriuretic peptide-53; NT-CNP53, N-terminal fragment of C-type natriuretic peptide -53; NT-proBNP, N-terminal pro-B type natriuretic peptide.
